# Supplementary material for: Galectin-1 Overexpression Activates the FAK/PI3K/AKT/mTOR Pathway and Is Correlated with Upper Urinary Urothelial Carcinoma Progression and Survival
Source: PubMed Central journal article supplement (PMC7226470; doi:10.3390/cells9040806), 2020-03-26
Supplement: cells-09-00806-s001.pdf [file cells-09-00806-s001.pdf]

**Supplementary Table 1. All differentially expressed genes from microarray screening analysis.**

| Gene Symbol               | Gene Name                                              | FC <sup>a</sup><br>versus Vector) | (Gal-KD<br><i>p</i> -Value |
|---------------------------|--------------------------------------------------------|-----------------------------------|----------------------------|
| <b>Up-regulated genes</b> |                                                        |                                   |                            |
| HAPLN1                    | hyaluronan and proteoglycan link protein 1             | 10.49                             | 0.0027085                  |
| THBS1                     | thrombospondin 1                                       | 9.20                              | 0.0022192                  |
| ODC1                      | ornithine decarboxylase 1                              | 6.38                              | 0.0055776                  |
| TGM2                      | transglutaminase 2                                     | 4.76                              | 0.0015627                  |
| IL7R                      | interleukin 7 receptor                                 | 4.75                              | 0.0017245                  |
| SERINC2                   | serine incorporator 2                                  | 4.51                              | 0.0014919                  |
| ITM2C                     | integral membrane protein 2C                           | 4.32                              | 0.0044644                  |
| SERPINB7                  | serpin peptidase inhibitor, clade B, member 7          | 4.18                              | 0.0081136                  |
| TNFRSF10D                 | tumor necrosis factor receptor superfamily, member 10d | 4.01                              | 0.0085561                  |
| TAGLN                     | transgelin                                             | 3.90                              | 0.0099963                  |
| LRRN4                     | leucine rich repeat neuronal 4                         | 3.82                              | 0.0046513                  |
| TGFB2                     | transforming growth factor beta 2                      | 3.51                              | 0.0035017                  |
| CPA4                      | carboxypeptidase A4                                    | 3.43                              | 0.0008452                  |
| EPB41L3                   | erythrocyte membrane protein band 4.1-like 3           | 3.34                              | 0.0025309                  |
| NRG1                      | neuregulin 1                                           | 3.28                              | 0.0079724                  |
| F3                        | coagulation factor III (thromboplastin, tissue factor) | 3.27                              | 0.0038968                  |
| POLR3G                    | polymerase III polypeptide G                           | 3.26                              | 0.0070675                  |
| SEMA7A                    | semaphorin 7A                                          | 3.20                              | 0.0087335                  |
| NT5E                      | 5-nucleotidase                                         | 3.17                              | 0.0036353                  |
| CAMK2N1                   | calmodulin-dependent protein kinase II inhibitor 1     | 3.07                              | 0.0090141                  |
| TIMP3                     | TIMP metalloproteinase inhibitor 3                     | 3.03                              | 0.0047953                  |
| SERPINE1                  | serpin peptidase inhibitor, clade E                    | 2.97                              | 0.0053652                  |
| MALL                      | mal, T-cell differentiation protein-like               | 2.88                              | 0.0078205                  |
| DDAH1                     | dimethylarginine dimethylaminohydrolase 1              | 2.86                              | 0.0002895                  |
| WDR3                      | WD repeat domain 3                                     | 2.85                              | 0.0058842                  |
| WNT5A                     | Wnt Family Member 5A                                   | 2.81                              | 0.0043796                  |
| GPR1                      | G protein-coupled receptor 1                           | 2.81                              | 0.0021313                  |
| HBEGF                     | heparin-binding EGF-like growth factor                 | 2.80                              | 0.0032597                  |
| EDIL3                     | EGF-like repeats and discoidin I-like domains 3        | 2.77                              | 0.0064593                  |
| ICK                       | intestinal cell (MAK-like) kinase                      | 2.74                              | 0.0087263                  |
| NOL10                     | nucleolar protein 10                                   | 2.73                              | 0.0066961                  |
| F2RL2                     | coagulation factor II (thrombin) receptor-like 2       | 2.71                              | 0.0026477                  |
| MEST                      | mesoderm specific transcript                           | 2.68                              | 0.0047733                  |
| PNP                       | purine nucleoside phosphorylase                        | 2.64                              | 0.0006370                  |
| BCS1L                     | BC1 (Ubiquinol-Cytochrome C Reductase) Synthesis-Like  | 2.63                              | 0.0045822                  |
| TIPIN                     | TIMELESS interacting protein                           | 2.61                              | 0.0018685                  |
| STC2                      | stanniocalcin 2                                        | 2.61                              | 0.0020449                  |
| MYCBP                     | MYC binding protein                                    | 2.51                              | 0.0085835                  |
| IL1RAP                    | interleukin 1 receptor accessory protein               | 2.50                              | 0.0021069                  |
| ASNS                      | asparagine synthetase                                  | 2.46                              | 0.0005380                  |
| AGPAT5                    | 1-acylglycerol-3-phosphate O-acyltransferase 5         | 2.45                              | 0.0077290                  |
| TES                       | testin LIM domain protein                              | 2.44                              | 0.0080561                  |
| ZNF92                     | zinc finger protein 92                                 | 2.42                              | 0.0026145                  |
| RPF2                      | ribosome production factor 2 homolog                   | 2.42                              | 0.0060742                  |
| UBE2G2                    | ubiquitin conjugating enzyme E2G 2                     | 2.42                              | 0.0044759                  |
| CMSS1                     | cms1 ribosomal small subunit homolog                   | 2.41                              | 0.0013667                  |
| SLC7A5                    | Solute Carrier Family 7 Member 5                       | 2.37                              | 0.0070138                  |

|         |                                                          |      |           |
|---------|----------------------------------------------------------|------|-----------|
| PDCD11  | programmed cell death 11                                 | 2.36 | 0.0022351 |
| EIF1AX  | eukaryotic translation initiation factor 1A, X-linked    | 2.33 | 0.0035100 |
| GTPBP10 | GTP-binding protein 10                                   | 2.30 | 0.0026921 |
| DKC1    | dyskeratosis congenita 1                                 | 2.28 | 0.0074376 |
| CCNE2   | cyclin E2                                                | 2.28 | 0.0031590 |
| KMT5B   | lysine (K)-specific methyltransferase 5B                 | 2.28 | 0.0099480 |
| BCCIP   | BRCA2 and CDKN1A interacting protein                     | 2.27 | 0.0084604 |
| LTBP1   | latent transforming growth factor beta binding protein 1 | 2.26 | 0.0062012 |
| EIF2S1  | eukaryotic translation initiation factor 2, subunit 1    | 2.24 | 0.0062113 |
| UBXN8   | UBX domain protein 8                                     | 2.24 | 0.0000869 |
| TAF9B   | TAF9B RNA polymerase II                                  | 2.23 | 0.0040446 |
| CMTM7   | Chemokine-Like Factor Superfamily Member 7               | 2.23 | 0.0093194 |
| NUP155  | nucleoporin 155kDa                                       | 2.22 | 0.0044288 |
| LTV1    | LTV1 ribosome biogenesis factor                          | 2.20 | 0.0013274 |
| MARCH3  | membrane associated ring finger 3                        | 2.18 | 0.0062510 |
| RPL7L1  | ribosomal protein L7-like 1                              | 2.18 | 0.0037954 |
| ASUN    | asunder spermatogenesis regulator                        | 2.17 | 0.0077355 |
| NUP43   | nucleoporin 43kDa                                        | 2.16 | 0.0015478 |
| WDR36   | WD repeat domain 36                                      | 2.16 | 0.0076450 |
| PPA1    | pyrophosphatase 1                                        | 2.14 | 0.0045189 |
| ACTBL2  | actin, beta-like 2                                       | 2.14 | 0.0056570 |
| FBXO5   | F-box protein 5                                          | 2.14 | 0.0011233 |
| NOL9    | nucleolar protein 9                                      | 2.12 | 0.0056674 |
| CALD1   | caldesmon 1                                              | 2.11 | 0.0000290 |
| PRDX3   | peroxiredoxin 3                                          | 2.10 | 0.0033899 |

---

|          |                                                         |      |           |
|----------|---------------------------------------------------------|------|-----------|
| PDCD2L   | programmed cell death 2-like                            | 2.09 | 0.0030242 |
| GPNPAT1  | glucosamine-phosphate N-acetyltransferase 1             | 2.08 | 0.0068834 |
| COBLL1   | cordon-bleu WH2 repeat protein like 1                   | 2.07 | 0.0064550 |
| SLC19A1  | solute carrier family 19 (folate transporter), member 1 | 2.07 | 0.0058154 |
| MAMLD1   | mastermind-like domain containing 1                     | 2.06 | 0.0058814 |
| NDUFAF5  | NADH dehydrogenase complex I, assembly factor 5         | 2.06 | 0.0000048 |
| NUP58    | nucleoporin 58kDa                                       | 2.06 | 0.0029590 |
| EIF3J    | eukaryotic translation initiation factor 3, subunit J   | 2.05 | 0.0019420 |
| C12orf45 | chromosome 12 open reading frame 45                     | 2.05 | 0.0072698 |
| GPR89A   | G protein-coupled receptor 89A                          | 2.04 | 0.0099709 |
| MTX3     | metaxin 3                                               | 2.03 | 0.0090794 |
| MMS22L   | MMS22-like, DNA repair protein                          | 2.02 | 0.0021267 |
| CSTF2    | cleavage stimulation factor, 3 pre-RNA, subunit 2       | 2.01 | 0.0043378 |

|        |                                             |      |           |
|--------|---------------------------------------------|------|-----------|
| DNAJC2 | DnaJ (Hsp40) homolog, subfamily C, member 2 | 2.01 | 0.0067042 |
|--------|---------------------------------------------|------|-----------|

**Down-regulated genes**

|          |                                                      |       |           |
|----------|------------------------------------------------------|-------|-----------|
| TSHZ2    | teashirt zinc finger homeobox 2                      | -2.00 | 0.0042495 |
| ASAH1    | N-acylsphingosine amidohydrolase (acid ceramidase) 1 | -2.01 | 0.0007973 |
| SCPEP1   | serine carboxypeptidase 1                            | -2.03 | 0.0037456 |
| GPC4     | glypican 4                                           | -2.05 | 0.0062917 |
| TSPAN15  | tetraspanin 15                                       | -2.11 | 0.0051585 |
| C10orf11 | chromosome 10 open reading frame 11                  | -2.13 | 0.0043902 |
| SOGA3    | SOGA family member 3                                 | -2.18 | 0.0033426 |
| P2RX4    | purinergic receptor P2X, ligand gated ion channel, 4 | -2.29 | 0.0021858 |
| SLC12A8  | solute carrier family 12, member 8                   | -2.29 | 0.0058458 |
| C3       | complement component 3                               | -2.37 | 0.0056417 |
| AKR1C3   | aldo-keto reductase family 1, member C3              | -2.47 | 0.0043377 |
| ABCA1    | ATP binding cassette subfamily A member 1            | -2.58 | 0.0014356 |
| SOD2     | superoxide dismutase 2, mitochondrial                | -2.59 | 0.0082673 |
| NPR1     | natriuretic peptide receptor 1                       | -2.66 | 0.0070771 |
| ELOVL4   | ELOVL fatty acid elongase 4                          | -2.77 | 0.0077961 |
| AHR      | aryl hydrocarbon receptor                            | -2.77 | 0.0041019 |
| FADS2    | fatty acid desaturase 2                              | -2.78 | 0.0074959 |
| SPP1     | secreted phosphoprotein 1                            | -2.82 | 0.0075980 |
| SAMD12   | sterile alpha motif domain containing 12             | -2.98 | 0.0008378 |
| RRAGD    | Ras-related GTP binding D                            | -2.99 | 0.0009023 |
| NMRK1    | nicotinamide riboside kinase 1                       | -3.12 | 0.0032059 |
| CYBRD1   | cytochrome b reductase 1                             | -3.21 | 0.0083560 |
| PROS1    | protein S (alpha)                                    | -3.25 | 0.0014517 |

| <b>CHI3L2</b> | <b>chitinase 3-like 2</b>                    | <b>-3.44</b> | <b>0.00331867</b> |
|---------------|----------------------------------------------|--------------|-------------------|
| IFIH1         | interferon induced, with helicase C domain 1 | -3.53        | 0.0014771         |
| IL18          | interleukin 18                               | -3.83        | 0.00322251        |
| SGPP2         | sphingosine-1-phosphate phosphatase 2        | -4.02        | 0.00059982        |
| DRAM1         | DNA-damage regulated autophagy modulator 1   | -4.12        | 0.00144567        |
| AICDA         | activation-induced cytidine deaminase        | -4.23        | 0.00448907        |
| ANK3          | ankyrin 3, node of Ranvier (ankyrin G)       | -4.65        | 0.00223546        |
| CPVL          | carboxypeptidase, vitellogenic-like          | -5.30        | 0.00142906        |
| MAL2          | mal, T-cell differentiation protein 2        | -11.37       | 0.00274742        |

<sup>a</sup>Fold change(FC) between drug-resistant samples and -sensitive samples. Fold change with a positive value indicates a relatively higher concentration present in drug-resistant samples while a negative value means a relatively lower concentration compared to control samples.

According to the criteria of fold change  $\geq 2$  and nominal significance level of 0.01, 119 differentially expressed genes (DEGs) were identified in microarray between GAL1 vector and GAL1-KD samples, of which 86 were upregulated and 32 were downregulated.
